# Supplementary material
Source: bioRxiv or medRxiv preprint supplement (https://medrxiv.org/content/medrxiv/early/2022/02/24/2022.02.23.22271414/DC1/embed/media-1.pdf)
Supplement: Supplementary file [file media-1.pdf]

## **Increase in SARS-CoV-2 RBD-specific IgA and IgG Antibodies in Breast Milk from Lactating Women Following the COVID-19 Booster Vaccination**

Andrea M. Henle

### **Supplementary Methods**

6 of the 12 participants were recruited prospectively and 6 were recruited approximately one month into the 90-day timeline for the study, but were eligible because they had dated and frozen aliquots of milk from the earlier required time points in the study.

Upon receipt in the lab, each 2 ounce or greater breast milk sample was centrifuged for 25 minutes at 2000 rpm and 4°C on a Thermo Scientific Sorvall Legend XTR centrifuge. The aqueous (serum) layer was separated from the fat layer and stored at -20°C until the ELISA assay was performed.

Participants used an alcohol swab and a finger-prick lancet device to collect up to 200 µl of blood into an BD microtainer in January 2022 (≥60 days post-booster). The blood was allowed to clot for 20 minutes at room temperature and then promptly stored at 4°C. Upon receipt in the lab, the blood was centrifuged at 10,000 rpm for 10 minutes at room temperature on an Eppendorf 5424 centrifuge. The serum layer was collected and stored at -20°C until the ELISA assay was performed.

For the ELISA, 96-well plates were coated for 2 hours with 100 µl/well of 4 µg/ml purified RBD-His spike protein (Ansell Corp.). The plates were aspirated and 300 µl/well of blocking buffer (Tris Buffered Saline/Glycine-0.1% BSA-10% glycerol 0.04% Sodium Azide, pH=7.45) was added for 1 hour at room temperature. Breast milk serum was diluted 1:5, and blood serum was diluted 1:100 for IgG analysis and 1:50 for IgA analysis, and incubated on the plates for 1 hour at room temperature with shaking. Plates were washed twice with 300 µl/well Tris Buffered Saline/Glycine, 0.1% BSA, 0.1% Pluronic acid, pH=7.49. Monoclonal mouse anti-human IgG-HRP (ICO-97)(0.8 µg/ml) and mouse anti-human IgA-HRP (Hisa43)(2 µg/ml) antibodies (100 µl/well) (Ansell Corp.) were added to capture the binding signal and the plates were incubated at room temperature with shaking for 1 hour. Plates were washed three times with 300 µl/well TBS. TMB H<sub>2</sub>O<sub>2</sub> substrate (Ansell Corp.) was used for detection at 450 nm on a Biotek Powerwave X plate reader. All breast milk and blood samples were run in triplicate. The negative control for this assay was a breast milk sample from July 2019. A positive control and standard curve were generated by serially diluting blood serum obtained from a COVID-19 positive patient in May 2020 into the 2019 negative control breast milk sample in duplicate.
